# Supplementary material for: Repercussions of the COVID-19 Response in Pregnant Women in Western Uganda: Knowledge, Behavior, and Emotional State after the First Lockdown in 2020
Source: MDPI journal article supplement (doi:10.3390/ijerph18157817), 2021-07-23
Supplement: s1 [file s1]

## Supplementary Material

**Table S1.** Descriptive Overview of Knowledge on COVID-19 and Prevention Measures n = 648.

|                                                              | N (%)      |
|--------------------------------------------------------------|------------|
| Ever heard of Coronavirus/COVID-19 (n=648)                   |            |
| Yes                                                          | 648 (100)  |
| No                                                           | 0 (0)      |
| Main sources of information (multiple answers)*<br>(n = 648) |            |
| TV                                                           | 369 (56.9) |
| Radio                                                        | 572 (88.3) |
| Other people/community                                       | 288 (44.4) |
| Social Media/internet                                        | 52 (8.0)   |
| Phone messages                                               | 41 (6.3)   |
| Hospital                                                     | 35 (5.4)   |
| Church                                                       | 18 (2.8)   |
| Other                                                        | 51 (7.9)   |
| Known symptoms (multiple answers) (n = 648)                  |            |
| Cough                                                        | 605 (93.4) |
| Fever                                                        | 603 (93.1) |
| Runny or stuffy nose                                         | 588 (91.0) |
| Shortness of breath                                          | 581 (89.7) |
| Headaches                                                    | 507 (78.5) |
| Sore throat                                                  | 504 (77.8) |
| Muscle body aches                                            | 405 (62.7) |
| Fatigue                                                      | 405 (62.7) |
| Loss of taste or smell (n = 647)                             | 397 (61.4) |
| Diarrhea                                                     | 331 (51.2) |
| 152 (23.5)                                                   |            |
| Knows there is no drug or vaccine** (n = 648)                |            |
| Correct answer                                               | 568 (87.7) |
| No correct answer/don't know                                 | 80 (12.3)  |
| Knows incubation period (n = 648)                            |            |
| Correct answer: up to 14 days                                | 545 (84.1) |
| No correct answer/don't know                                 | 102 (16.8) |
| Know how to protect myself from infection (n = 648)          |            |
| Not at all/To a small extent                                 | 163 (25.2) |
| To a large extent/Very much so                               | 485 (74.8) |
| Avoiding an infection is (n = 648)                           |            |
| Extremely difficult/Somewhat difficult                       | 102 (15.7) |
| Somewhat easy/Extremely easy                                 | 546 (84.3) |
| I follow the recommendations (n = 648)                       |            |
| Not at all/To a small extent                                 | 99 (15.3)  |
| To a larger extent/Very much so                              | 549 (84.7) |
| <b>Prevention measures taken since start of the epidemic</b> |            |
| Hand washing (n = 646)                                       |            |
| Never/Rarely                                                 | 60 (9.3)   |
| Sometimes                                                    | 225 (34.8) |
| Often                                                        | 361 (55.9) |
| Avoiding touching own face (n = 648)                         |            |
| Never/Rarely                                                 | 137 (21.1) |
| Sometimes                                                    | 275 (42.4) |
| Often                                                        | 236 (36.4) |

|                                                      |            |
|------------------------------------------------------|------------|
| Use disinfectants (n = 648)                          |            |
| Never/Rarely                                         | 251 (38.7) |
| Sometimes                                            | 188 (29.0) |
| Often                                                | 209 (32.3) |
| Staying home when sick (n = 648)                     |            |
| Never/Rarely                                         | 88 (13.6)  |
| Sometimes                                            | 242 (37.4) |
| Often                                                | 318 (49.1) |
| Covering when sneezing/coughing (n = 646)            |            |
| Never/Rarely                                         | 54 (8.4)   |
| Sometimes                                            | 234 (36.2) |
| Often                                                | 358 (55.4) |
| Wearing face masks (n = 648)                         |            |
| Never/Rarely                                         | 53 (8.2)   |
| Sometimes                                            | 204 (31.5) |
| Often                                                | 391 (60.3) |
| Physical distancing 2m to others (n = 648)           |            |
| Never/Rarely                                         | 126 (19.4) |
| Sometimes                                            | 297 (45.8) |
| Often                                                | 225 (34.7) |
| Staying home (n = 648)                               |            |
| Never/Rarely                                         | 107 (16.5) |
| Sometimes                                            | 282 (43.5) |
| Often                                                | 259 (40.0) |
| Disinfecting surfaces (n = 648)                      |            |
| Never/Rarely                                         | 311 (48.1) |
| Sometimes                                            | 222 (34.3) |
| Often                                                | 114 (17.6) |
| Disinfecting mobile phones (n = 644)                 |            |
| Never/Rarely                                         | 470 (73.0) |
| Sometimes                                            | 115 (17.9) |
| Often                                                | 59 (9.2)   |
| Not seeing family and friends for me is... (n = 648) |            |
| Impossible/Hard                                      | 261 (40.3) |
| Not very hard/No problem                             | 387 (59.7) |

\* Question was asked as "How have you heard of Corona?" as an open-ended question; \*\* as of June-September 2020.

**Table S2.** Descriptive overview of behavioral aspects and psychosocial impact of the pandemic n = 648.

| <b>Behavioral Adaptions</b>                                        | <b>N (%)</b> |
|--------------------------------------------------------------------|--------------|
| Bought food supplies (n = 647)                                     |              |
| I already did that/I plan to do that                               | 540 (83.5)   |
| I don't plan to do that                                            | 107 (16.5)   |
| Avoided people from other countries like China or Europe (n = 648) |              |
| I already did that/ I plan to do that                              | 599 (92.4)   |
| I don't plan to do that                                            | 49 (7.6)     |
| Exercised less (n = 647)                                           |              |
| I already did that/ Likely I'll do that                            | 313 (48.4)   |
| Unlikely I'll do that                                              | 334 (51.6)   |
| Drank more alcohol (n = 648)                                       |              |
| I already did that/Likely I'll do that                             | 72 (11.1)    |
| Unlikely I'll do that                                              | 576 (88.9)   |

|                                                                                                                                                                                            |                                 |
|--------------------------------------------------------------------------------------------------------------------------------------------------------------------------------------------|---------------------------------|
| Ate more unhealthy (n = 648)<br>I already did that/ Likely I'll do that<br>Unlikely I'll do that                                                                                           | 145 (22.4)<br>503 (77.6)        |
| Asked family/friends not to visit (n = 644)<br>I already did that/I plan to do that<br>I don't plan to do that                                                                             | 334 (51.9)<br>310 (48.1)        |
| Bought PPE (n = 648)<br>I already did that/I plan to do that<br>I don't plan to do that                                                                                                    | 581 (89.7)<br>67 (10.3)         |
| Avoided going to health facility (n = 647)<br>I already did that/I plan to do that<br>I don't plan to do that                                                                              | 40 (6.2)<br>607 (93.8)          |
| <b>Pandemic affecting pregnancy care</b>                                                                                                                                                   |                                 |
| Could not access healthcare/ANC, or was denied care (n = 644)<br>Changed facility/plans where to deliver the baby (n = 645)<br>Lacking access to information or medical supplies (n = 647) | 87 (13.5)<br>8 (1.2)<br>8 (1.2) |
| <b>Currently having worries about...</b>                                                                                                                                                   |                                 |
| Losing someone beloved (n = 648)<br>worrying a lot<br>to some extent/ not at all                                                                                                           | 588 (90.7)<br>60 (9.3)          |
| Current pregnancy (n = 648)<br>worrying a lot<br>to some extent/ not at all                                                                                                                | 565 (87.2)<br>83 (12.8)         |
| Health system overload (n = 648)<br>worrying a lot<br>to some extent/ not at all                                                                                                           | 528 (81.5)<br>120 (18.5)        |
| Own mental health (n = 648)<br>worrying a lot<br>to some extent/ not at all                                                                                                                | 456 (70.4)<br>192 (29.6)        |
| Own physical health (n = 648)<br>worrying a lot<br>to some extent/ not at all                                                                                                              | 480 (74.2)<br>167 (25.8)        |
| Liberty of movement (n = 647)<br>worrying a lot<br>to some extent/ not at all                                                                                                              | 329 (50.9)<br>318 (49.1)        |
| Economic recession (n = 647)<br>worrying a lot<br>to some extent/ not at all                                                                                                               | 313 (48.4)<br>334 (51.6)        |
| Restricted access to food (n=647)<br>worrying a lot<br>to some extent/ not at all                                                                                                          | 342 (52.9)<br>305 (47.1)        |
| Unable to pay bills (n = 648)<br>worrying a lot<br>to some extent/ not at all                                                                                                              | 332 (51.2)<br>316 (48.8)        |
| Unable to visit dependents (n = 648)<br>worrying a lot<br>to some extent/ not at all                                                                                                       | 277 (42.7)<br>371 (57.3)        |
| Having to defend social decisions (n = 648)<br>worrying a lot                                                                                                                              | 246 (38.0)                      |

|                                                                     |            |
|---------------------------------------------------------------------|------------|
| to some extent/ not at all                                          | 402 (62.0) |
| Unemployment (n = 648)<br>worrying a lot                            | 389 (60.0) |
| to some extent/ not at all                                          | 259 (40.0) |
| Small companies running out of business (n = 648)<br>worrying a lot | 310 (47.8) |
| to some extent/ not at all                                          | 338 (52.2) |
| Loved ones health (n = 646)<br>worrying a lot                       | 486 (75.2) |
| to some extent/ not at all                                          | 160 (24.8) |

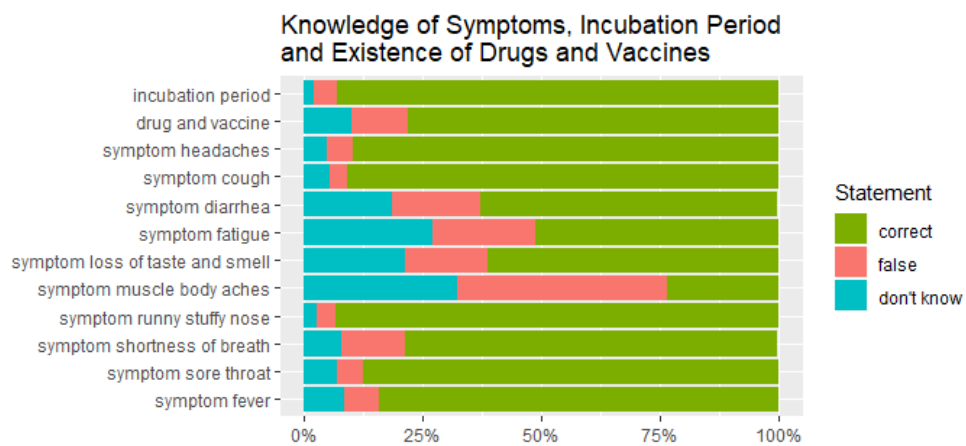

**Figure S1:** SARS-CoV-2 related knowledge in pregnant women.
